# Supplementary material
Source: PubMed Central journal article supplement (PMC528755)

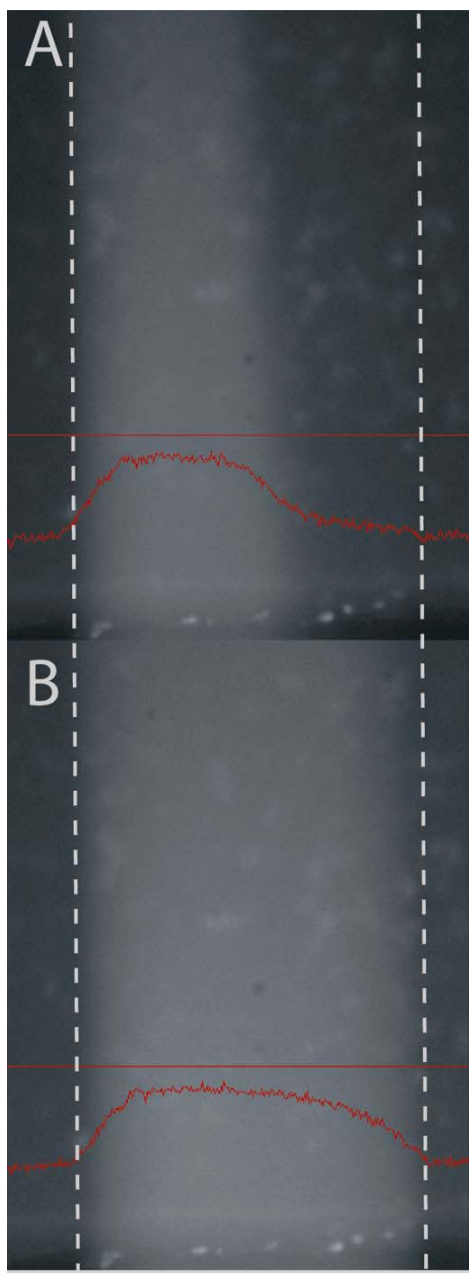

Supplement: pnas_101_45_15861__2.pdf [file pnas_101_45_15861__2.pdf]

## Multiple Inlet Experiments

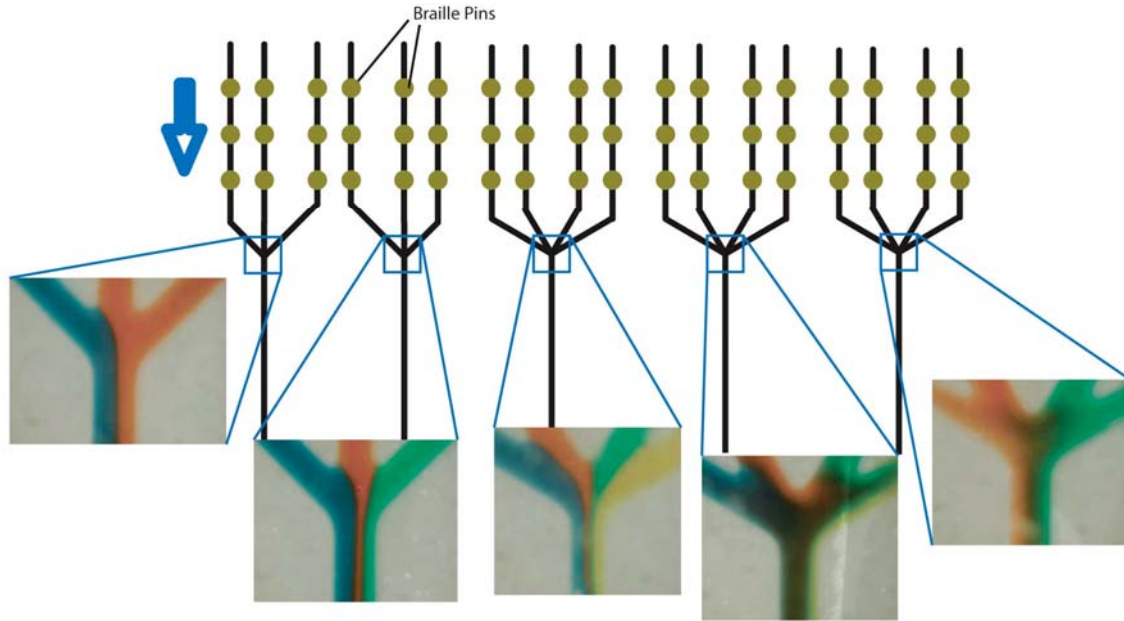

Supplement: pnas_101_45_15861__3.pdf [file pnas_101_45_15861__3.pdf]
